# Supplementary material for: Heteroleptic bis(dipyrrinato)copper(ii) and nickel(ii) complexes
Source: Royal Society of Chemistry journal article supplement (doi:10.1039/c5dt00724k), 2015-01-01
Supplement: c5dt00724k1.pdf [file c5dt00724k1.pdf]

## Electronic Supplementary Information

for

### Heteroleptic bis(dipyrrinato)copper(II) and nickel(II) complexes

Ryojun Toyoda, Mizuho Tsuchiya, Ryota Sakamoto,\* Ryota Matsuoka,  
Kuo-Hui Wu, Yohei Hattori and Hiroshi Nishihara

Department of Chemistry, Graduate School of Science, The University of Tokyo, 7-3-1,  
Hongo, Bunkyo-ku, Tokyo 113-0033, Japan.  
sakamoto@chem.s.u-tokyo.ac.jp

|                                         |    |
|-----------------------------------------|----|
| 1. General experimental procedures..... | S1 |
| 2. Synthesis.....                       | S2 |
| 3. X-ray crystallographic data.....     | S4 |
| 4. Chronocoulometry.....                | S6 |
| 5. References for ESI.....              | S7 |

## 1. General experimental procedures

All commercially available chemicals were purchased and used without further purification unless otherwise noted. Preparative gel permeation liquid chromatography (GPC) was performed by LC-918 with JAIGEL 1H and 2H column (Japan Analytical Industry) using chloroform as the mobile phase.  $^1\text{H}$  NMR and  $^{13}\text{C}$  NMR data were collected in  $\text{CDCl}_3$  on a Bruker US500 spectrometer. Tetramethylsilane ( $\delta_{\text{H}} = 0.00$ ) was used as an internal standard for the  $^1\text{H}$  NMR spectrum, and  $\text{CDCl}_3$  ( $\delta_{\text{C}} = 77.00$ ) was used as an internal standard for the  $^{13}\text{C}$  NMR spectrum, respectively. High resolution mass spectroscopy was performed on JEOL JMS-700MStation mass spectrometer (HRFAB-MS). UV-visible absorption spectra were recorded on a JASCO V-570 spectrometer. Fluorescence spectra were collected with a HITACHI F-4500 spectrometer. X-ray diffraction data were collected at 93 K on a Rigaku Saturn724 (Varimax dual) diffractometer with multi-layer mirror monochromated  $\text{MoK}\alpha$  radiation ( $\lambda = 0.71075 \text{ \AA}$ ) using Crystal Clear (Rigaku) or at 173 K on a Rigaku Saturn724 diffractometer with graphite monochromated  $\text{MoK}\alpha$  radiation ( $\lambda = 0.71070 \text{ \AA}$ ) using Crystal Clear (Rigaku). The structures were solved by means of the direct method using SIR92<sup>S1</sup> and refined by the full-matrix least-squares using SHELXL97.<sup>S2</sup> CCDC 1047911 (for **3**) and 1047912 (for **4**) contain the supplementary crystallographic data for this paper. These data may be obtained free of charge from The Cambridge Crystallographic Data Centre via [www.ccdc.cam.ac.uk/data\\_request/cif](http://www.ccdc.cam.ac.uk/data_request/cif). Cyclic voltammetry and chronocoulometry were performed by ALS 650DT electrochemical analyzer. For each measurement, an  $\text{Ag}^+/\text{Ag}$  reference electrode (0.01 M  $\text{AgClO}_4$  and  $\text{Bu}_4\text{NClO}_4/\text{acetonitrile}$ ) and a Pt wire counter electrode were implemented in order to establish a three-electrode system. The cell was filled with dichloromethane solution of each sample (0.5 mM) and  $\text{Bu}_4\text{NClO}_4$  (0.1 M) as an electrolyte. The cell was sealed, and was deoxygenized by Ar bubbling for more than 5 min prior to a measurement.

## 2. Synthesis

### 2.1 Dipyrrrin ligands

The two ligands for the complexes, **1** and **2**, were obtained following the reported methods.<sup>S3</sup>

### 2.1 Copper complex 3

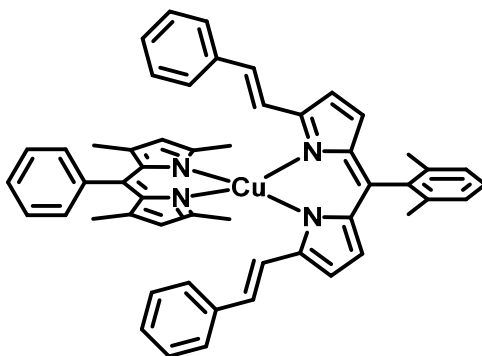

To a MeOH (5 mL) solution of Cu(OAc)<sub>2</sub> (25 mg, 0.14 mmol), was added a CHCl<sub>3</sub> (20 mL) solution of **1** (56 mg, 0.20 mmol) and **2** (91 mg, 0.20 mmol). After stirring the reaction mixture overnight at room temperature, the solvent was evaporated and the residue was purified by GPC to give complex **3** (16 mg, 15 %) as a brown solid.

HRFAB-MS: 789.2991 [M]<sup>+</sup>, calcd. for : C<sub>52</sub>H<sub>46</sub>N<sub>4</sub>Cu<sup>+</sup>: 789.3018.

### 2.1 Nickel complex 4

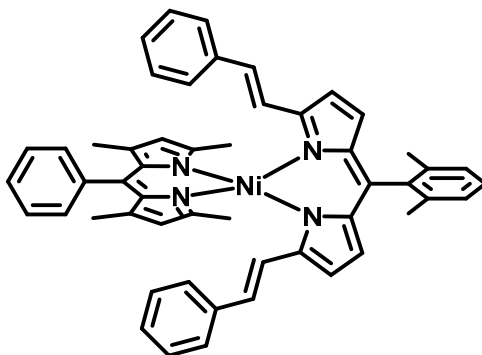

To a MeOH (5 mL) solution of Ni(OAc)<sub>2</sub>·4H<sub>2</sub>O (35 mg, 0.14 mmol), was added a CHCl<sub>3</sub> (20 mL) solution of **1** (56 mg, 0.20 mmol) and **2** (91 mg, 0.20 mmol). After stirring the reaction mixture overnight at room temperature, the solvent was evaporated and the residue was purified by GPC to give complex **4** (44 mg, 40 %) as a brown solid.

HRFAB-MS: 784.3070 [M]<sup>+</sup>, calcd. for : C<sub>52</sub>H<sub>46</sub>N<sub>4</sub>Ni<sup>+</sup>: 784.3076.

## 2.3 Zinc complex 5

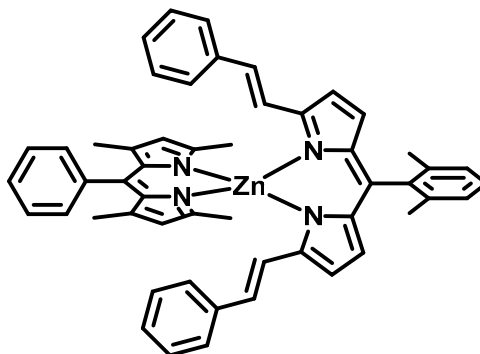

To a MeOH (5 mL) solution of  $\text{Zn}(\text{OAc})_2$  (25 mg, 0.14 mmol), was added a  $\text{CHCl}_3$  (20 mL) solution of **1** (55 mg, 0.20 mmol) and **2** (91 mg, 0.20 mmol). After stirring the reaction mixture overnight at room temperature, the solvent was evaporated and the residue was purified by GPC to give complex **5** (48 mg, 44 %) as a brown solid.

$^1\text{H}$  NMR (500 MHz,  $\text{CDCl}_3$ ):  $\delta$  = 7.53–7.54 (m, 3H), 7.44–7.46 (m, 2H), 7.20–7.28 (m, 11H), 7.14 (d,  $J$  = 7.6 Hz, 2H), 7.03 (d,  $J$  = 16 Hz, 2H), 6.95 (d,  $J$  = 16 Hz, 2H), 6.76 (d,  $J$  = 4.4 Hz, 2H), 6.52 (d,  $J$  = 4.1 Hz, 2H), 5.96 (s, 2H), 2.20 (s, 6H), 2.01 (s, 6H), 1.39 (s, 6H);  $^{13}\text{C}$  NMR (125 MHz,  $\text{CDCl}_3$ ):  $\delta$  = 157.78, 157.07, 144.95, 144.54, 141.68, 140.80, 140.25, 138.50, 137.37, 136.96, 135.62, 132.05, 131.27, 129.86, 128.71, 128.55, 128.35, 127.81, 127.61, 126.90, 126.82, 122.76, 121.02, 115.06, 19.82, 16.19, 15.51; HRFAB-MS: 790.3032  $[\text{M}]^+$ , calcd. for :  $\text{C}_{52}\text{H}_{46}\text{N}_4\text{Zn}^+$ : 790.3014.

### 3. X-ray Crystallographic data

#### 3.1 Copper complex 3

Table S1. Crystallographic data for **3**

|                                                |                                                  |
|------------------------------------------------|--------------------------------------------------|
| Empirical Formula                              | C <sub>52</sub> H <sub>46</sub> CuN <sub>4</sub> |
| Formula Weight / g mol <sup>-1</sup>           | 790.51                                           |
| Temperature / K                                | 93                                               |
| $\lambda$ / Å                                  | 0.71075                                          |
| Crystal System                                 | triclinic                                        |
| Space Group                                    | P-1                                              |
| $a$ / Å                                        | 8.024(3)                                         |
| $b$ / Å                                        | 12.015(5)                                        |
| $c$ / Å                                        | 21.266(9)                                        |
| $\alpha$ / °                                   | 87.690(9)                                        |
| $\beta$ / °                                    | 89.191(9)                                        |
| $\gamma$ / °                                   | 88.2546(10)                                      |
| $V$ / Å <sup>3</sup>                           | 2047(2)                                          |
| $Z$                                            | 2                                                |
| $d_{\text{calcd}}$ / g cm <sup>-3</sup>        | 1.282                                            |
| $\mu$ (MoK $\alpha$ ) / cm <sup>-1</sup>       | 5.749                                            |
| $F(000)$                                       | 830.00                                           |
| Crystal size / mm <sup>3</sup>                 | 0.350×0.050×0.050                                |
| Theta range for data collection                | 3.00 to 27.50 °                                  |
| Index ranges                                   | -10≤ $h$ ≤10, -15≤ $k$ ≤15, -18≤ $l$ ≤27         |
| Reflections collected                          | 16535                                            |
| Independent reflections                        | 8976 ( $R_{\text{int}}$ = 0.0564)                |
| Data completeness                              | 95.3 %                                           |
| Max. and min. transmission                     | 0.692 and 0.972                                  |
| Refinement method                              | Full-matrix least-squares on $F^2$               |
| Data / restraints / parameters                 | 8976 / 0 / 514                                   |
| <sup>a</sup> Goodness-of-Fit on $F^2$          | 1.000                                            |
| <sup>b</sup> $R_1$ [ $I > 2.00\sigma(I)$ ]     | 0.0623                                           |
| <sup>c</sup> $wR_2$ (all reflections)          | 0.2049                                           |
| Largest diff. peak and hole / eÅ <sup>-3</sup> | 0.84 and -1.01                                   |

<sup>a</sup> GOF =  $[\Sigma(w(F_o^2 - F_c^2)^2 / \Sigma(N_r - N_p)^2)]$ . <sup>b</sup>  $R_1 = \Sigma||F_o| - |F_c|| / \Sigma|F_o|$  ( $I > 2 \sigma(I)$ ).

<sup>c</sup>  $wR_2 = [\Sigma(w(F_o^2 - F_c^2)^2 / \Sigma w(F_o^2)^2)]^{1/2}$  ( $I > 2 \sigma(I)$ ).

### 3.2 Nickel complex 4

Table S2. Crystallographic data for **4**

|                                                |                                                  |
|------------------------------------------------|--------------------------------------------------|
| Empirical Formula                              | C <sub>52</sub> H <sub>46</sub> NiN <sub>4</sub> |
| Formula Weight / g mol <sup>-1</sup>           | 785.66                                           |
| Temperature / K                                | 173                                              |
| $\lambda$ / Å                                  | 0.71070                                          |
| Crystal System                                 | triclinic                                        |
| Space Group                                    | P-1                                              |
| $a$ / Å                                        | 8.0620(12)                                       |
| $b$ / Å                                        | 12.042(2)                                        |
| $c$ / Å                                        | 21.376(4)                                        |
| $\alpha$ / °                                   | 87.391(3)                                        |
| $\beta$ / °                                    | 88.849(4)                                        |
| $\gamma$ / °                                   | 88.017(3)                                        |
| $V$ / Å <sup>3</sup>                           | 2071.4(6)                                        |
| $Z$                                            | 2                                                |
| $d_{\text{calcd}}$ / g cm <sup>-3</sup>        | 1.260                                            |
| $\mu$ (MoK $\alpha$ ) / cm <sup>-1</sup>       | 5.094                                            |
| $F(000)$                                       | 828.00                                           |
| Crystal size / mm <sup>3</sup>                 | 0.100×0.300×0.500                                |
| Theta range for data collection                | 3.18 to 27.48 °                                  |
| Index ranges                                   | -9≤ $h$ ≤10, -15≤ $k$ ≤15, -26≤ $l$ ≤27          |
| Reflections collected                          | 16143                                            |
| Independent reflections                        | 9013 ( $R_{\text{int}} = 0.0183$ )               |
| Data completeness                              | 94.6 %                                           |
| Max. and min. transmission                     | 0.833 and 0.950                                  |
| Refinement method                              | Full-matrix least-squares on $F^2$               |
| Data / restraints / parameters                 | 9013 / 0 / 520                                   |
| <sup>a</sup> Goodness-of-Fit on $F^2$          | 1.038                                            |
| <sup>b</sup> $R_1$ [ $I > 2.00\sigma(I)$ ]     | 0.0379                                           |
| <sup>c</sup> $wR_2$ (all reflections)          | 0.1018                                           |
| Largest diff. peak and hole / eÅ <sup>-3</sup> | 0.35 and -0.37                                   |

<sup>a</sup> GOF =  $[\Sigma(w(F_o^2 - F_c^2)^2 / \Sigma(N_r - N_p)^2)]^{1/2}$ . <sup>b</sup>  $R_1 = \Sigma||F_o| - |F_c|| / \Sigma|F_o|$  ( $I > 2 \sigma(I)$ ).

<sup>c</sup>  $wR_2 = [\Sigma(w(F_o^2 - F_c^2)^2 / \Sigma w(F_o^2)^2)]^{1/2}$  ( $I > 2 \sigma(I)$ ).

## 4. Chronocoulometry

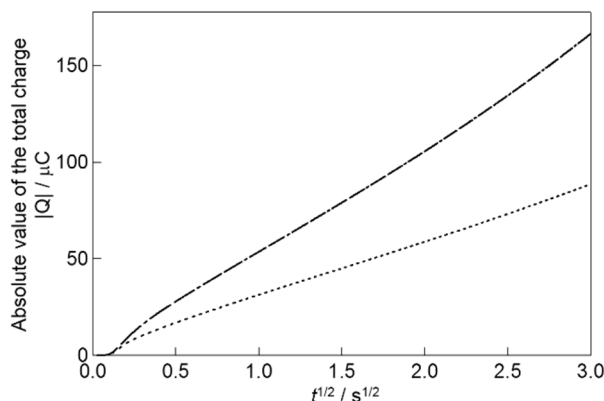

**Fig. S1**  $|Q|$ - $t^{1/2}$  plots of the oxidation process (dashed dotted line) and the reduction process (dotted line) in the cyclic voltammogram of **4**.

Fig. S1† shows the  $|Q|$ - $t^{1/2}$  plots, where  $Q$  is the total charge and  $t$  is the elapsed time. Apart from the beginning of the polarization, where charging of the electric double layer plays a chief role, the  $|Q|$ - $t^{1/2}$  plot shows a linear relationship. Therefore, both the oxidation and reduction processes are diffusion-controlled. In this scenario, eq (1) may be applicable.<sup>S4</sup>

$$Q = 2nFACD\pi^{1/2}t^{1/2} \quad (1)$$

where  $n$  is the number of electrons involved in the redox reaction,  $F$  is the Faraday constant,  $A$  is the electrode area,  $C$  is the concentration, and  $D$  is the diffusion coefficient of the analyte. All factors are common for the oxidation and reduction of **4** except for  $n$ ; hence, the slope of the  $|Q|$ - $t^{1/2}$  plot is proportional to  $n$ . The slopes are  $5.7 \times 10^{-5}$  and  $2.9 \times 10^{-5}$  for oxidation and reduction, respectively, indicating a ratio of 2:1 for  $n$ .

## 5. References for ESI

- S1 A. Altomare, G. Cascarano, C. Giacovazzo, A. Guagliardi, M. C. Burla, G. Polidori, and M. Camalli, *J. Appl. Crystallogr.*, 1994, **27**, 435.
- S2 G. M. Sheldrick, *Acta Crystallogr. A.*, 2008, **64**, 112.
- S3 (a) M. Tsuchiya, R. Sakamoto, S. Kusaka, Y. Kitagawa, M. Okumura and H. Nishihara, *Chem. Commun.*, 2014, **50**, 5881; (b) S. Telitel, J. Lalevée, N. Blanchard, T. Kavalli, M. Tehfe, S. Schweizer, F. Morlet-Savary, B. Graff and J. Fouassier, *Macromolecules*, 2012, **45**, 6864.
- S4 A. J. Bard, L. R. Faulkner, in *Electrochemical Methods: Fundamentals and Applications*, ed. D. Harris, E. Swain, C. Robey and E. Aiello, Wiley, Hoboken, 2nd edn., 2000, ch. 5, pp. 210.
